# Supplementary material for: Monitoring of Particulate Matter Emissions from 3D Printing Activity in the Home Setting
Source: MDPI journal article supplement (doi:10.3390/s21093247), 2021-05-07
Supplement: s1 [file s1]

## Article

# Monitoring of Particulate Matter Emissions from 3D Printing Activity in the Home Setting

Shirin Khaki <sup>1,2,3</sup>, Emer Duffy <sup>1,2</sup>, Alan F. Smeaton <sup>1,4</sup> and Aoife Morrin <sup>1,2,3\*</sup>

<sup>1</sup> Insight, SFI Research Centre for Data Analytics, Dublin City University, Glasnevin, Dublin 9, Ireland; shirin.khaki2@mail.dcu.ie (S.K.); emer.duffy25@mail.dcu.ie (E.D.); alan.smeaton@dcu.ie (A.F.S.)

<sup>2</sup> National Centre for Sensor Research, Dublin City University, Glasnevin, Dublin 9, Ireland

<sup>3</sup> School of Chemical Sciences, Dublin City University, Glasnevin, Dublin 9, Ireland

<sup>4</sup> School of Computing, Dublin City University, Glasnevin, Dublin 9, Ireland

\* Correspondence: aoife.morrin@dcu.ie

## Supplementary Information

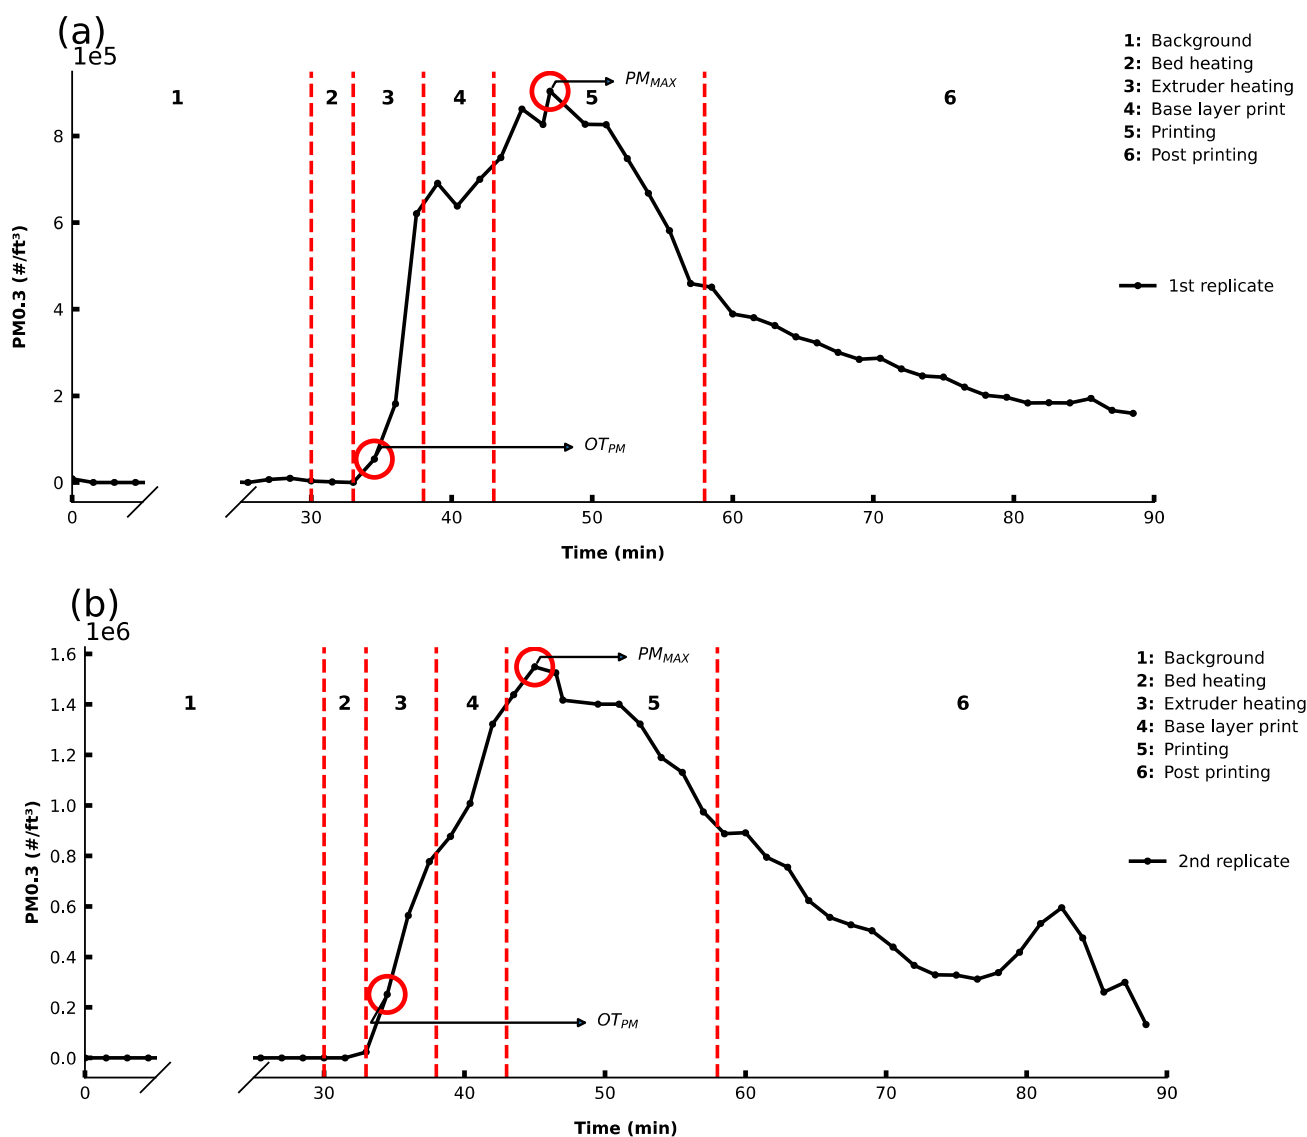

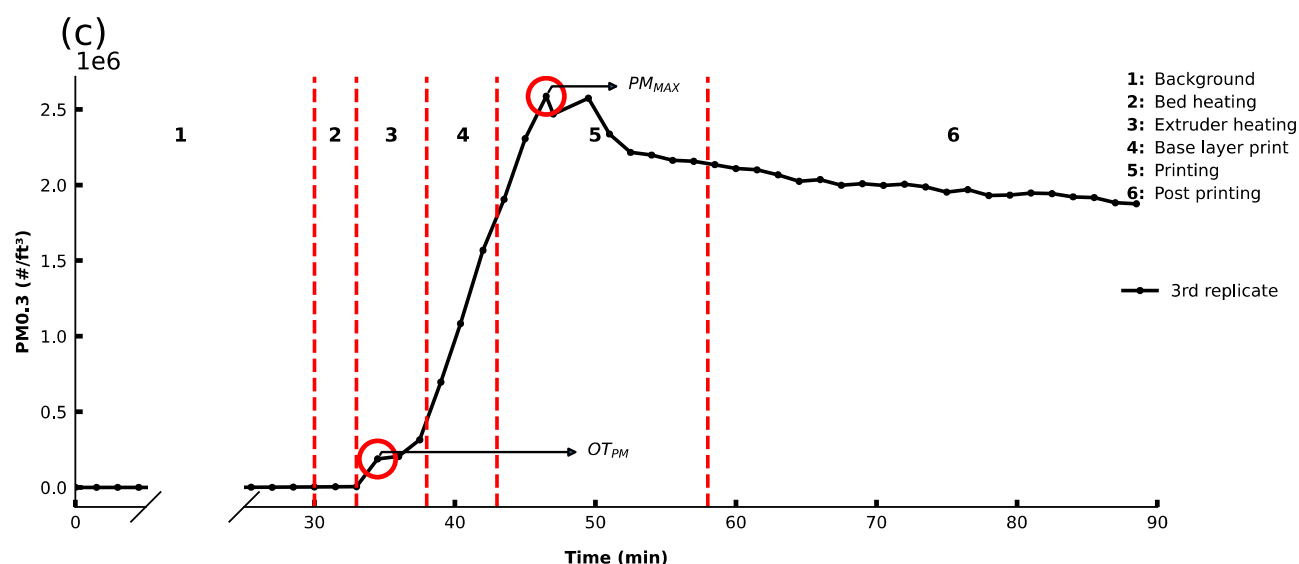

Figure S1. PM 0.3 emission profiles for 3 over time before, during and after printing of a cube object for ABSB1b (bed plate temperature: 80 °C; extruder temp: 245 °C, 0% fan, 20% infill) for 3 replicates.

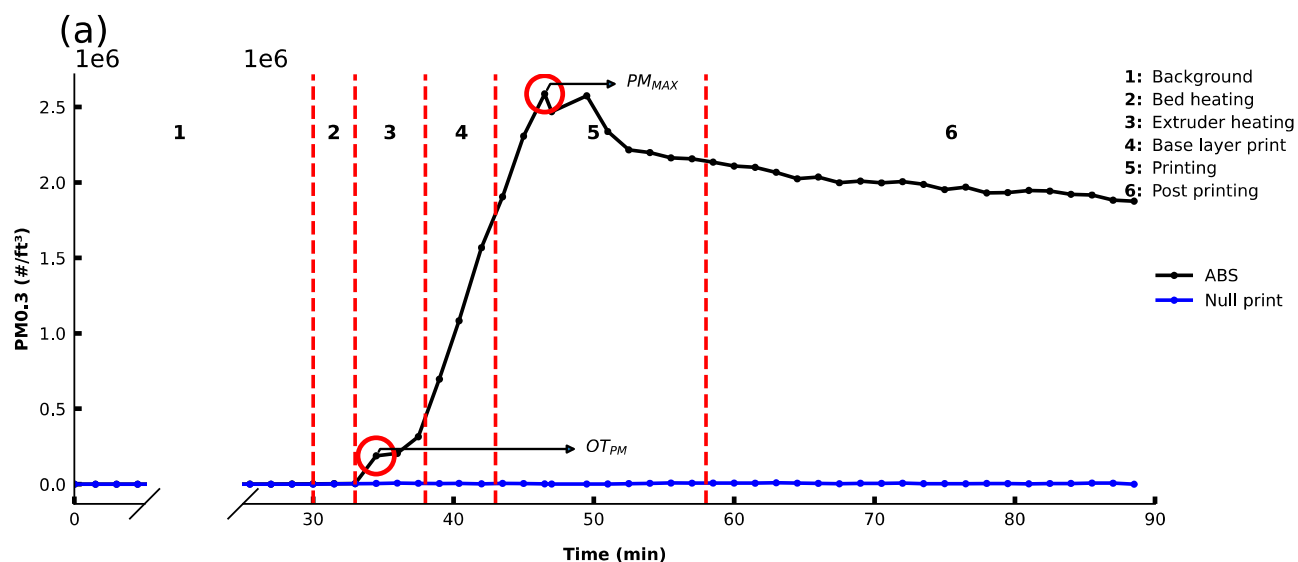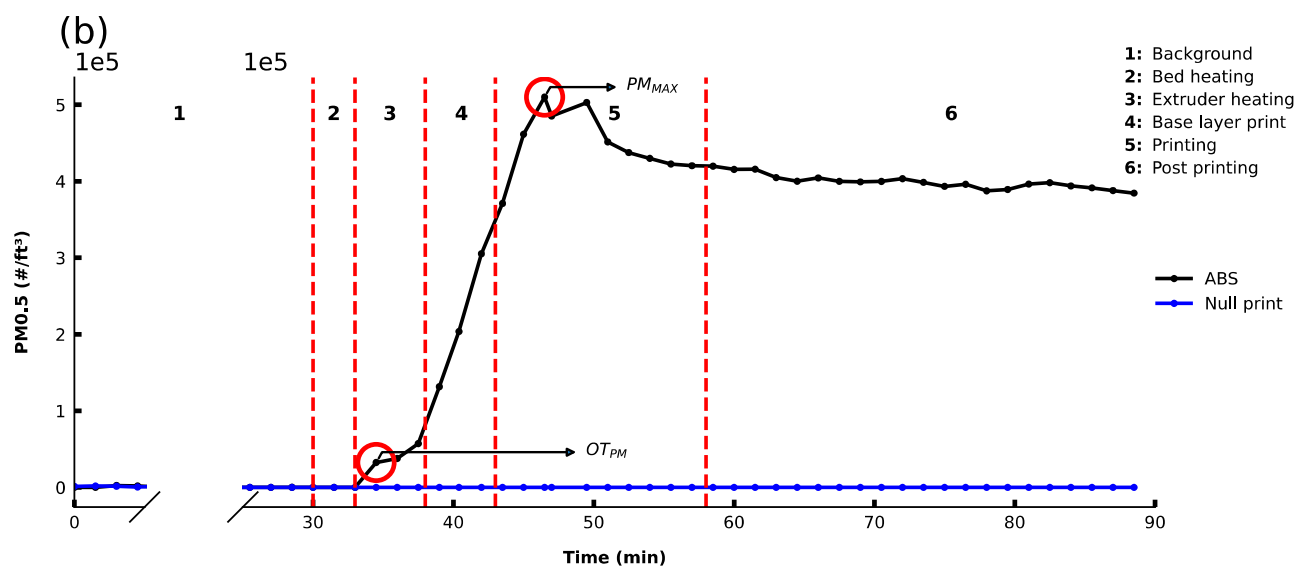

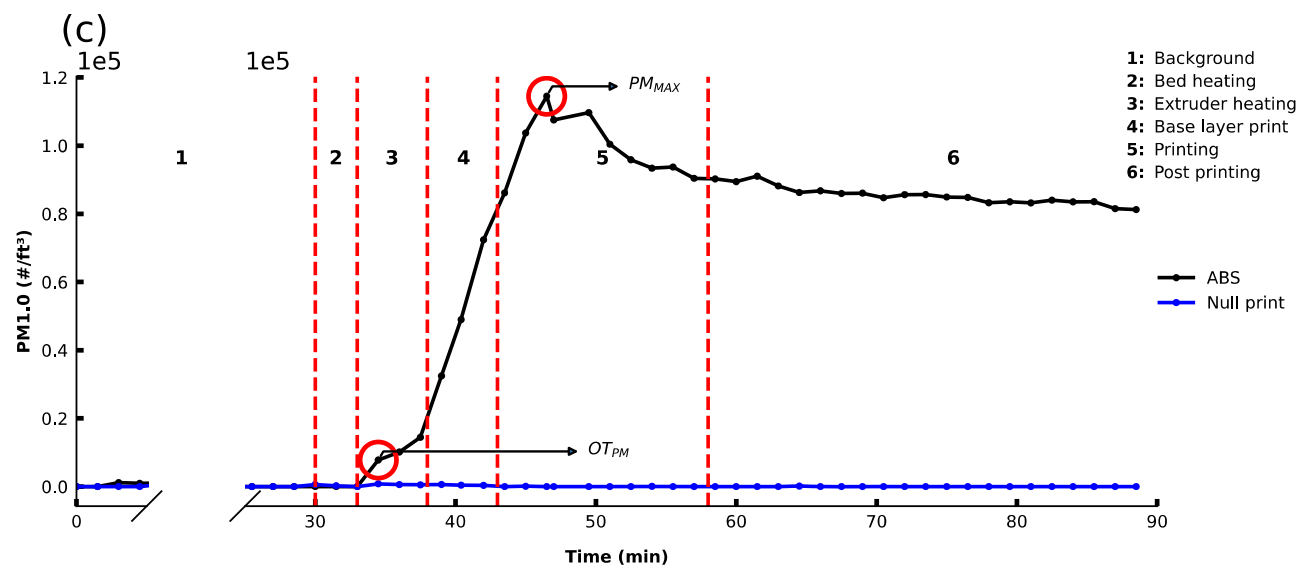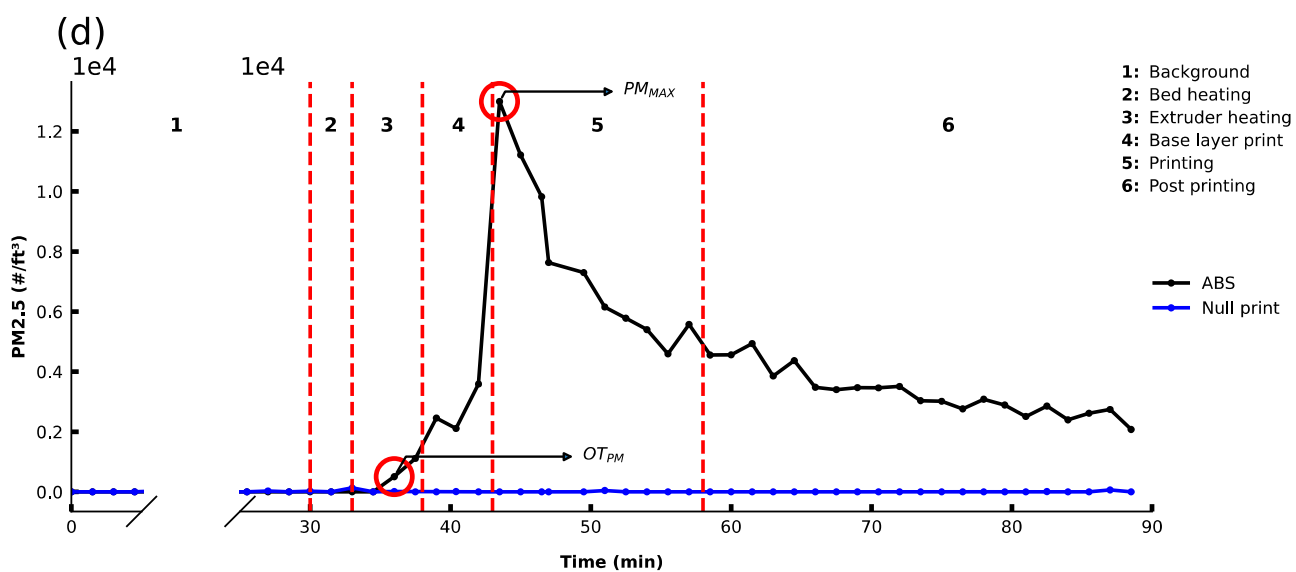

**Figure S2.** PM emission profiles for (a) PM 0.3, (b) PM 0.5, (c) PM 1.0, (d) PM 2.5 over time before, during and after printing of a cube object for ABSB1b (bed plate temperature: 80 °C; extruder temp: 245 °C, 0% fan, 20% infill).
